# Supplementary material for: Skin and heart allograft rejection solely by long-lived alloreactive TRM cells in skin of severe combined immunodeficient mice
Source: PubMed Central journal article supplement — Sci Adv. 2022 Jan 26;8(4):eabk0270. doi: 10.1126/sciadv.abk0270 (PMC8791614; doi:10.1126/sciadv.abk0270), 2022-01-26
Supplement: sciadv.abk0270_sm.pdf [file sciadv.abk0270_sm.pdf]

Supplementary Materials for  
**Skin and heart allograft rejection solely by long-lived alloreactive T<sub>RM</sub> cells in skin of severe combined immunodeficient mice**

Qianchuan Tian, Zhaoqi Zhang, Liang Tan, Fan Yang, Yanan Xu, Yinan Guo, Dong Wei, Changhong Wu, Peng Cao, Jiawei Ji, Wei Wang\*, Xubiao Xie\*, Yong Zhao\*

\*Corresponding author. Email: zhaoy@ioz.ac.cn (Y.Z.); xiexubiao@csu.edu.cn (X.X.); zico73@medmail.com.cn (W.W.)

Published 26 January 2022, *Sci. Adv.* **8**, eabk0270 (2022)  
DOI: 10.1126/sciadv.abk0270

**The PDF file includes:**

Supplementary Materials and Methods  
Figs. S1 to S7

**Other Supplementary Material for this manuscript includes the following:**

Data files S1 and S2

## **Supplementary Materials**

### **Materials and Methods**

#### **Isolation of immune cells in skin and heart tissues**

Skin and heart were quickly cut into small pieces with a scalpel, then digested for 60 min (for skin) or 40 min (for heart) at 37°C with 400 U/ml collagenase IV (Sigma-Aldrich), 10 mM HEPES and 0.01% DNase I (MP Biomedicals) in HBSS. Digested suspensions were passed through a nylon mesh. Then cells were collected after centrifugation at 300 g for 10 min. For cell surface marker staining, skin single cells were re-suspended in FACS staining buffer. For cytokine staining, cells were pre-incubated at 37°C and 5% CO<sub>2</sub> in RPMI + 10% FCS + 10 ng/mL PMA + 100 ng/mL ionomycin in the presence of GolgiPlug (BD) during 6 h. For intracellular staining, Fixation/Permeabilization Solution Kit (BD, cat# 554714) was used.

#### **Flow cytometry**

The cells from the harvested skin, hearts, and spleens were washed once with FACS buffer (PBS, pH 7.2, containing 0.1% NaN<sub>3</sub> and 0.5% bovine serum albumin). Then, cells were re-suspended in FACS buffer and stained with antibodies. The following anti-mouse mAbs used for cell staining were purchased from BD Biosciences Pharmingen (San Diego, CA, USA): anti-mCD69-PE, anti-mCD4-PE-Cy5, anti-mCD8-BV421, anti-mKi67-PE, anti-mCD44-FITC, anti-mCD62L-PE, anti-mIL-17A-PE, and anti-mIL-17F-APC. The following anti-mouse mAbs were purchased from eBioscience (San Diego, CA, USA): Fixable Viability Dye eFluor™ 506, anti-mCD103-FITC, anti-mCD45-APC, and anti-mF4/80-FITC. The following anti-mouse mAbs were purchased from Biolegend: anti-mTCRβ-PE-Cy7 and anti-mH-2D<sup>d</sup>-PE. All flow cytometry data were obtained with an LSRFortessa™ X-20 instrument (BD Biosciences, CA, USA) and analyzed with FlowJo V 10 software (Treestar, OR, USA).

### Adoptive transfer of CD4<sup>+</sup> T cells or CD8<sup>+</sup> T cells

Splenocytes from BALB/c mice were stained with CD4-PE, CD8-PE-Cy5, and TCR $\beta$ -APC-Cy7. The CD4<sup>+</sup> or CD8<sup>+</sup> T cells were sorted by MoFlo XDP sorter (Beckman), and  $1 \times 10^6$  sorted BALB/c CD4<sup>+</sup> or CD8<sup>+</sup> T cells were adoptively transferred to MHC-matched immunodeficient SCID mice via the tail vein injection.

### Quantitative PCR analysis

Total RNA was isolated with TRIzol (Invitrogen, Carlsbad, CA) and reverse transcribed with Superscript II (Qiagen) according to the manufacturer's instructions. The cDNA served as template for amplifying target genes and the housekeeping gene (HPRT) by real-time PCR. Target gene expression was calculated using the comparative method for relative quantification upon normalization to HPRT gene expression. Primers used in the present study are listed in Table 1.

**Table 1.** Primers used for qRT-PCR analysis.

| Genes  |                 | Primer sequence (5'-3')    |
|--------|-----------------|----------------------------|
| HPRT   | Forward primer: | AGTACAGCCCCAAAATGGTTAAG    |
|        | Reverse primer: | CTTAGGCTTTGTATTTGGCTTTTC   |
| Rorc   | Forward primer: | GACCCACACCTCACAAATTGA      |
|        | Reverse primer: | AGTAGGCCACATTACACTGCT      |
| IL-17A | Forward primer: | CTCAGACTACCTCAACCGTTCC     |
|        | Reverse primer: | ATGTGGTGGTCCAGCTTTCC       |
| IL-17F | Forward primer: | CATACCCAGGAAGACATACTTAGAAG |
|        | Reverse primer: | AGTCCCAACATCAACAGTAGC      |
| IL-22  | Forward primer: | CTGAGAAATGCTTGCGTCTG       |
|        | Reverse primer: | CGTTAGCTTCTCACTTTCCTTTAG   |
| IL-23  | Forward primer: | CTGAGAAGCAGGGAACAAGATG     |
|        | Reverse primer: | GAAGATGTCAGAGTCAAGCAGGTG   |
| Tnfsf4 | Forward primer: | TGCTTCATCTATGTCTGCCTG      |
|        | Reverse primer: | CTCACATCTGGTAACTGCTCC      |

|        |                 |                         |
|--------|-----------------|-------------------------|
| Tnfsf8 | Forward primer: | AGGAAATTGCTCAGAGGATCTC  |
|        | Reverse primer: | CTGGTATATGAGTCCGTGGATG  |
| Lta    | Forward primer: | CGCACAGCAGGTTCTCCACAT   |
|        | Reverse primer: | CCAACAAGGTGAGCAGCAGGTT  |
| CCL1   | Forward primer: | AGAGGCTTGAGACAGAACTTATC |
|        | Reverse primer: | GCAGCTATTGGAGACCGTAAG   |
| CCL20  | Forward primer: | TGGGTTTCACAAGACAGATGG   |
|        | Reverse primer: | GACTCTTAGGCTGAGGAGGTTC  |
| CXCL1  | Forward primer: | GCACCCAAACCGAAGTCATAG   |
|        | Reverse primer: | AGAAGCCAGCGTTCACCAGA    |
| CXCL2  | Forward primer: | GCCCAGACAGAAGTCATAGCC   |
|        | Reverse primer: | CTCCTCCTTTCCAGGTCAGTTA  |
| CXCL9  | Forward primer: | CCACTACAAATCCCTCAAAGAC  |
|        | Reverse primer: | TCTAGGCAGGTTTGATCTCC    |

---

## RNA-seq analysis

We sorted naïve CD4<sup>+</sup>T cells (CD4<sup>+</sup>CD62L<sup>+</sup>CD44<sup>low</sup>) and CD8<sup>+</sup>T cells (CD8<sup>+</sup>CD62L<sup>+</sup>CD44<sup>low</sup>) from C57BL/6 mice by using an MoFlo XDP cell sorter (BeckMan Coulter, Brea, CA, USA). Total RNA was extracted using TRIzol agent (Thermo Fisher Scientific, 15596018). First strand cDNA synthesis and cDNA amplification was performed using Smart-Seq2 method. And Agilent 2100 High Sensitivity DNA Assay Kit (Agilent Technologies, CA, USA) was used to amplify the quality of products. Using Bioruptor Sonication System and CWBIO Gel Extraction Kit following manufacturer instructions, we performed library construction, then assessed and quantified the insertion size (library valid concentration >10 nM). The libraries were sequenced by an Illumina Hiseq platform with 150 bp paired end. The CD4<sup>+</sup> T<sub>RM</sub> and CD8<sup>+</sup> T<sub>RM</sub> cells were sorted by CD4<sup>+</sup>CD69<sup>+</sup> and CD8<sup>+</sup>CD69<sup>+</sup> cells in the skin from BALB/c mice at 100 days after the first allogeneic transplantation. The T<sub>RM</sub> during the secondary allograft rejection were sorted by CD4<sup>+</sup> CD69<sup>+</sup> cells during the skin transplant rejection. All samples were collected in tubes containing lysis

components and ribonuclease inhibitors. All RNA extraction, library preparation, and sequencing were performed by Annoroad Gene Tech. (Beijing) Co., Ltd. The amplification was carried out by the Smart-Seq2 method. The qualified libraries were also loaded onto the Illumina HiSeq platform for the PE150 sequencing.

The mapping software HISAT2 was used to map the reads to the mouse mm10 reference genome and StringTie to construct transcripts independently for each cell (32). DEGseq was used to identify the differentially expressed genes. We set  $q < 0.01$  and  $|\log_2(\text{foldchange})| > 1$  to a significant difference in the sensitive  $T_{RM}$  vs.  $T_{RM}$  during rejection comparison thresholds and set  $q < 0.05$  and  $|\log_2(\text{foldchange})| > 0$  to a significant difference in the naïve T vs. sensitive  $T_{RM}$  comparison thresholds. Gene ontology (GO) functional annotation analysis was performed on all cell differential genes using the DAVID Bioinformatics Resources 6.8 online search tool (<https://david.ncifcrf.gov/>)(58). KEGG pathway analysis was performed on all the different genes of each cell using the KOBAS online search tool (<http://kobas.cbi.pku.edu.cn/>)(59, 60). The protein interaction network was obtained by STRING (<https://string-db.org/>) and visualized by Cytoscape (61).

## Supplementary Figures

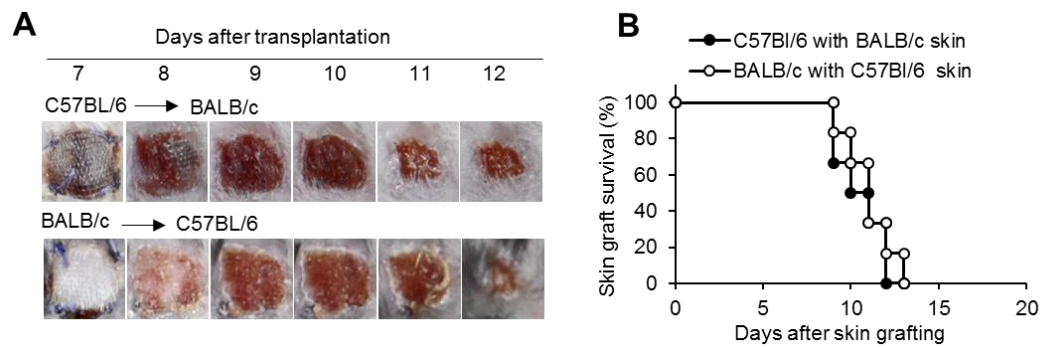

**Fig. S1. Allogeneic skin graft rejection in immunocompetent recipient mice.**

Rejection kinetics of C57BL/6 tail skin transplanted to BALB/c and BALB/c tail skin transplanted on C57BL/6. (A) Pictures for skin grafts at different days after grafting. (B) Allogeneic skin graft survival in BALB/c or C57BL/6 mice. n=5 per group.

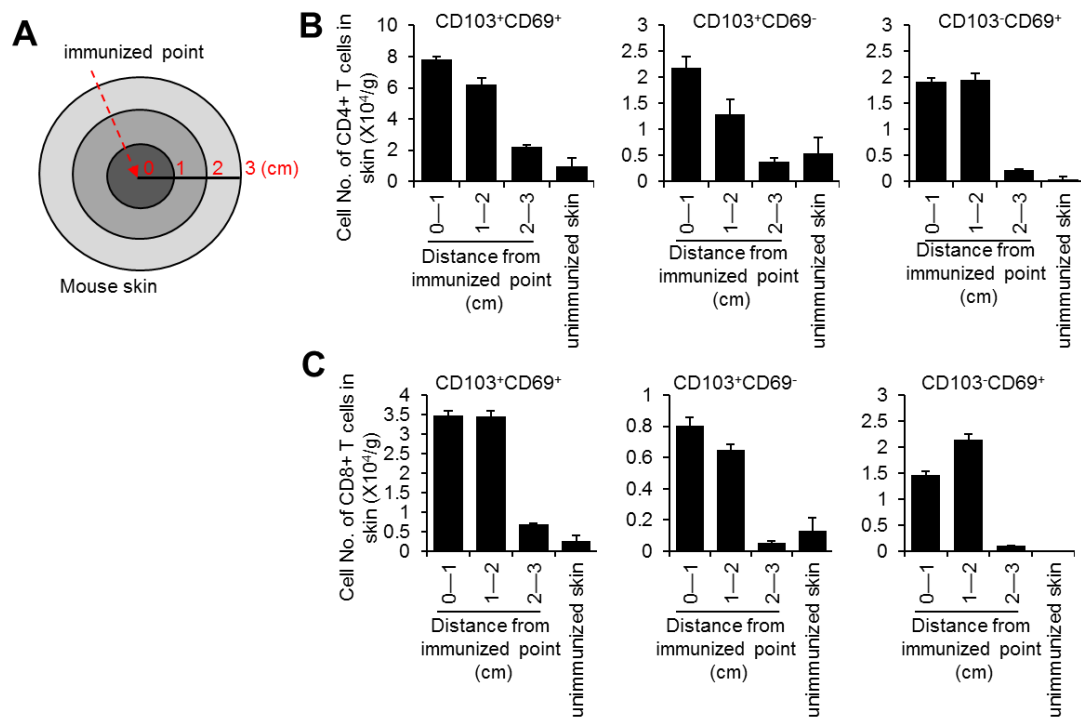

**Fig. S2. The levels of TRM cells in recipient skin tissues in different distance from the immunized site**

(A) An abridged general view to show how to harvest the skin tissues at different distances from the immunized site in C57BL/6 skin-immunized BALB/c mice. Samples were harvested >60 days after skin grafting. (B) The cell number of CD103<sup>+</sup>CD69<sup>+</sup>CD4<sup>+</sup>T cells, CD103<sup>+</sup>CD69<sup>-</sup>CD4<sup>+</sup>T cells and CD103<sup>-</sup>CD69<sup>+</sup>CD4<sup>+</sup>T cells in skin tissues at different distances (0–1 cm, 1–2cm, and 2–3cm) from the immunized point. (C) The number of CD103<sup>+</sup>CD69<sup>+</sup>CD8<sup>+</sup>T cells, CD103<sup>+</sup>CD69<sup>-</sup>CD8<sup>+</sup>T cells and CD103<sup>-</sup>CD69<sup>+</sup>CD8<sup>+</sup>T cells in skin tissues at different distances (0–1 cm, 1–2cm, and 2–3cm) from the immunized point. Data were as means  $\pm$  SD (n=5 per group). \*P < 0.05, \*\*P < 0.01, compared with the unimmunized mice.



**A** TPM of genes in naïve CD8<sup>+</sup> T cells and induced CD8<sup>+</sup> T<sub>RM</sub>

| NAME    | CD8 <sup>+</sup> naïve T | Induced CD8 <sup>+</sup> T <sub>RM</sub> | q-value   |
|---------|--------------------------|------------------------------------------|-----------|
| Itgae   | 212.6266                 | 398.6                                    | 7.52E-14  |
| Cd69    | 749.554749               | 1543.247192                              | 5.71E-62  |
| Nr4a1   | 17.60304                 | 287.8665                                 | 2.31E-61  |
| Nr4a2   | 2.941558                 | 469.1043                                 | 1.26E-104 |
| Ctla4   | 4.854103                 | 80.08604                                 | 3.92E-18  |
| Cdh1    | 3.031012                 | 72.17342                                 | 1.86E-17  |
| Cd244   | 0.811938                 | 8.125371                                 | 0.0052982 |
| Prdm1   | 1.437966                 | 5.91217                                  | 0.0399369 |
| Rgs1    | 158.4129                 | 4191.923                                 | 0         |
| Rgs2    | 40.41766                 | 2520.587                                 | 0         |
| Fabp5   | 9.949105                 | 161.196                                  | 6.98E-35  |
| Bhlhe40 | 3.165554                 | 308.5725                                 | 3.15E-43  |
| S1pr1   | 592.748                  | 50.93488                                 | 1.69E-114 |
| Ccr7    | 1734.583                 | 238.7452                                 | 1.72E-275 |
| Sell    | 2043.933                 | 19.69108                                 | 0         |
| Hnf1a   | 0.778143                 | 0                                        | 0.99      |

**B** TPM of genes in naïve CD4<sup>+</sup> T cells and Induced CD4<sup>+</sup> T<sub>RM</sub>

| NAME    | CD4 <sup>+</sup> naïve T | Induced CD4 <sup>+</sup> T <sub>RM</sub> | q-value   |
|---------|--------------------------|------------------------------------------|-----------|
| Itgae   | 7.871458                 | 86.38226                                 | 9.51E-18  |
| Cd69    | 1011.228                 | 2879.709                                 | 3.86E-204 |
| Nr4a1   | 85.39578                 | 307.1277                                 | 3.34E-30  |
| Nr4a2   | 3.812084                 | 362.3801                                 | 7.64E-85  |
| Ctla4   | 55.2963                  | 579.6899                                 | 2.09E-108 |
| Cdh1    | 0.64784                  | 23.5601                                  | 3.96E-07  |
| Cd244   | 1.563139                 | 0.03277                                  | 0.0590746 |
| Prdm1   | 8.371254                 | 31.55357                                 | 8.69E-05  |
| Rgs1    | 354.114                  | 4910.296                                 | 0         |
| Rgs2    | 87.66627                 | 1912.042                                 | 0         |
| Fabp5   | 7.860053                 | 514.8943                                 | 7.69E-122 |
| Bhlhe40 | 10.06881                 | 193.6891                                 | 3.91E-72  |
| S1pr1   | 693.2351                 | 61.72812                                 | 2.04E-132 |
| Ccr7    | 1729.056                 | 337.5967                                 | 2.50E-222 |
| Sell    | 1542.406                 | 31.47326                                 | 0         |
| Hnf1a   | 0.274315                 | 0                                        | 9.90E-01  |

**Fig. S4. Expression levels of some marker genes in the induced T<sub>RM</sub>.**

MARS (MA-plot-based method with Random Sampling model) method was used to identify differentially expressed genes in CD8<sup>+</sup> T<sub>RM</sub> or CD4<sup>+</sup> T<sub>RM</sub> cells. (A) The TPM of genes in naïve CD8<sup>+</sup> T cells and the induced CD8<sup>+</sup> T<sub>RM</sub>. (B) The TPM of genes in naïve CD4<sup>+</sup> T cells and induced CD4<sup>+</sup> T<sub>RM</sub>. The q-value of each gene compared between naïve T cells and the induced T<sub>RM</sub> are shown in the table. The data are shown as heatmap figures in Figure 1C.

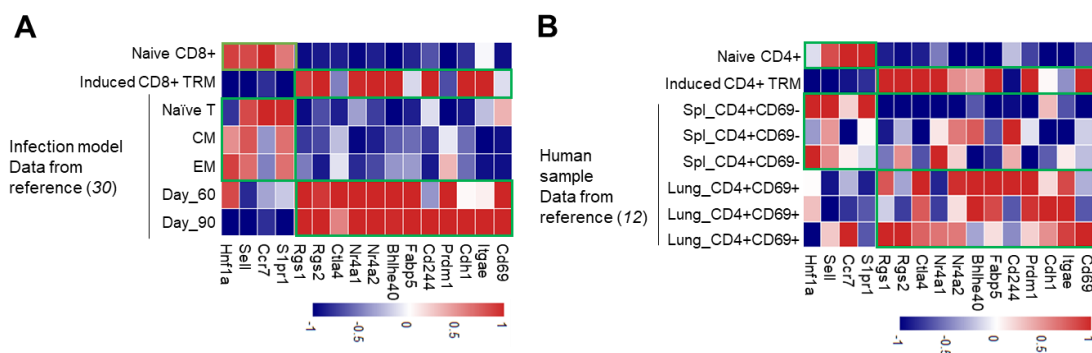

**Fig. S5. The differential expressed genes in induced  $T_{RM}$ , naïve T cells,  $T_{CM}$ , and  $T_{EM}$  cells.**

(A) The differential expressed genes in induced  $CD8^+$   $T_{RM}$ , naïve  $CD8^+$  T cells,  $CD8^+$   $T_{CM}$ ,  $CD8^+$   $T_{EM}$  cells, and  $CD8^+$   $T_{RM}$  at different days after infection. Some data were cited from reference (30). (B) The differential expressed genes in induced  $CD4^+$   $T_{RM}$ , naïve  $CD4^+$  T cells, human splenic  $CD4^+CD69^-$  T cells, and human lung  $CD4^+CD69^+$   $T_{RM}$ . Some data were cited from reference(12).

**A** Up-regulated pathways in CD4<sup>+</sup> T<sub>RM</sub> during rejection compared with induced CD4<sup>+</sup> T<sub>RM</sub>

| Pathway                                     | Pvalue   |
|---------------------------------------------|----------|
| Ubiquitin mediated proteolysis              | 9.63E-08 |
| Protein processing in endoplasmic reticulum | 1.00E-07 |
| Apoptosis                                   | 9.36E-07 |
| TNF signaling pathway                       | 9.89E-07 |
| NF-kappa B signaling pathway                | 2.37E-06 |
| Th17 cell differentiation                   | 4.02E-06 |
| Endocytosis                                 | 7.70E-06 |
| Platelet activation                         | 1.29E-05 |
| Autophagy - animal                          | 2.07E-05 |
| Inositol phosphate metabolism               | 2.91E-05 |
| Phosphatidylinositol signaling system       | 3.55E-05 |
| Lysosome                                    | 0.000124 |
| Regulation of actin cytoskeleton            | 0.000196 |
| Cytokine-cytokine receptor interaction      | 0.000197 |
| Natural killer cell mediated cytotoxicity   | 0.00023  |

**B** The expression of Th-related genes which were up-regulated and down-regulated in CD4<sup>+</sup> T<sub>RM</sub> during graft rejection

| Gene    | Change | TRM      | TRM during rejection | qvalue    |
|---------|--------|----------|----------------------|-----------|
| Rorc    | up     | 3.466398 | 17.48575             | 0.000784  |
| Smad4   | up     | 45.25118 | 131.9815             | 5.40E-11  |
| Hif1a   | up     | 249.2381 | 840.6531             | 4.20E-74  |
| Ccr6    | up     | 77.93236 | 175.2119             | 9.40E-10  |
| Il18rap | up     | 8.584725 | 58.27309             | 2.61E-10  |
| Il17a   | up     | 0        | 1743.096             | 1.81E-213 |
| Il17f   | up     | 30.28435 | 2109.64              | 0         |
| Il22    | up     | 122.6038 | 1848.742             | 0         |
| Tgfb3   | up     | 32.59842 | 58.90336             | 0.0027288 |
| Runx3   | up     | 55.45087 | 58.17526             | 0.2078105 |
| Tnf     | up     | 313.9238 | 374.5043             | 0.0087271 |
| Cxcr3   | up     | 43.16075 | 70.92978             | 0.0041335 |
| Smad3   | down   | 18.50295 | 7.549831             | 0.0118483 |
| Tgfb2   | down   | 80.98253 | 67.03509             | 0.079067  |
| Tbx21   | down   | 106.3326 | 5.182178             | 2.67E-24  |
| Gata3   | down   | 277.631  | 86.40135             | 5.87E-24  |
| Rxra    | down   | 11.08842 | 1.690623             | 0.0027431 |
| Ccl4    | down   | 192.4087 | 1.756501             | 8.90E-45  |
| Ccl5    | down   | 1080.743 | 0                    | 4.07E-149 |
| Il12rb2 | down   | 22.16243 | 5.918955             | 0.0008706 |
| Pdlim5  | down   | 76.69997 | 38.19008             | 0.0001845 |

**Fig. S6. The shift of Th cell subsets-related genes in CD4<sup>+</sup> T<sub>RM</sub> cells during graft rejection.**

(A) The up-regulated pathways in the induced CD4<sup>+</sup> T<sub>RM</sub> cells during graft rejection vs. the induced CD4<sup>+</sup> T<sub>RM</sub> without rejection. (B) The altered expression of Th-related genes in activated CD4<sup>+</sup> T<sub>RM</sub> during graft rejection compared with the induced CD4<sup>+</sup> T<sub>RM</sub> without rejection.

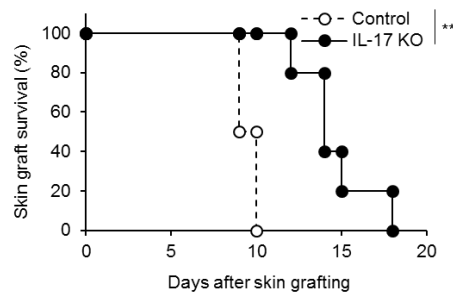

**Fig. S7. BALB/c allogeneic skin graft rejection in Rag2KO mice with a piece of syngeneic immunized WT or IL-17KO skin tissue.**

Thirty or more days after C57BL/6 or IL-17KO mice were immunized by BALB/c tail skin, one piece of the immunized C57BL/6 or IL-17KO mouse skin (2×2 cm) was harvested and grafted onto syngeneic Rag2KO mice. After Rag2KO mice were recovered for 30 days or so, a BALB/c tail skin was transplanted inside that 2×2 cm<sup>2</sup> immunized skin in Rag2KO mice. BALB/c skin graft survival in Rag2KO recipients with the immunized C57BL/6 or IL-17KO mouse skin tissue were shown (n=5 per group). \*\*P < 0.01 compared between the indicated groups.
